# Supplementary material
Source: Elsevier journal article supplement (https://www.sciencedirect.com/science/article/pii/S0021755720302515)
Supplement: mmc1 [file S0021755720302515:mmc1.docx]

**Table S1 - Clinical features of the participants.**

| **Parameters** |  | **Control (n = 26)** | **MPP (n = 31)** | ***P* value** |
| --- | --- | --- | --- | --- |
| Age (mean ± SD, months) |  | 6.9 ± 2.0 | 7.1 ± 2.7 | 0.548 |
| Male (n, %) |  | 12 (46.2) | 17 (54.8) | 0.345 |
| Duration of fever, (mean ± SD, d) |  | 0 ± 0.0 | 5.7 ± 2.8 | < 0.001 |
| White blood cell counts (mean ± SD, × 109/L) |  | 6.8 ± 1.4 | 8.8 ± 3.9 | 0.103 |
| Neutrophils (mean ± SD, × 109/L) |  | 0.5 ± 0.4 | 2.3 ± 1.3 | < 0.001 |
| C-reactive protein (25th–75th percentile, mg/L) |  | 0.08 (0.01–0.4) | 13.5 (5.7–19.5) | < 0.001 |
| L-lactate dehydrogenase (mean ± SD, U/L) |  | 217.3 ± 37.5 | 426.7 ± 146.3 | < 0.001 |
| Lymphocyte subgroups (mean ± SD, %) |  |  |  |  |
| CD3+ |  | 69.4 ± 5.5 | 65.8 ± 7.9 | 0.138 |
| CD3 + CD4+ |  | 37.7 ± 5.2 | 36.4 ± 4.8 | 0.583 |
| CD3 + CD8+ |  | 24.6 ± 2.8 | 26.2 ± 6.6 | 0.25 |
| CD3-CD19+ |  | 15.2 ± 5.3 | 17.9 ± 6.1 | 0.157 |
| CD3-CD (16 + 56+) |  | 18.2 ± 5.7 | 12.8 ± 4.2 | 0.007 |
| CD19 + CD23+ |  | 5.2 ± 1.7 | 9.0 ± 4.4 | < 0.001 |
| *M. pneumoniae* specific IgG (mean ± SD, RU/mL) |  | 0.2 ± 0.1 | 2.7 ± 1.9 | < 0.001 |

SD, standard deviation; MMP, mycoplasma pneumoniae pneumonia.
